# Supplementary material for: Luminescence tuning of the Dy–Zn metal–organic framework and its application in the detection of Fe(iii) ions
Source: Royal Society of Chemistry journal article supplement (doi:10.1039/c6tc00832a), 2016-01-01
Supplement: c6tc00832a1.pdf [file c6tc00832a1.pdf]

## Supporting Information

### Luminescence tuning of the Dy-Zn metal-organic framework and its application in detection of Fe (III) ion

Yu-Fei Li, Dan Wang, Zhuang Liao, Yang Kang, Wei-Hua Ding, Xiang-Jun Zheng\* and Lin-Pei Jin

Beijing Key Laboratory of Energy Conversion and Storage Materials, College of Chemistry, Beijing Normal University, Beijing, 100875, People's Republic of China.

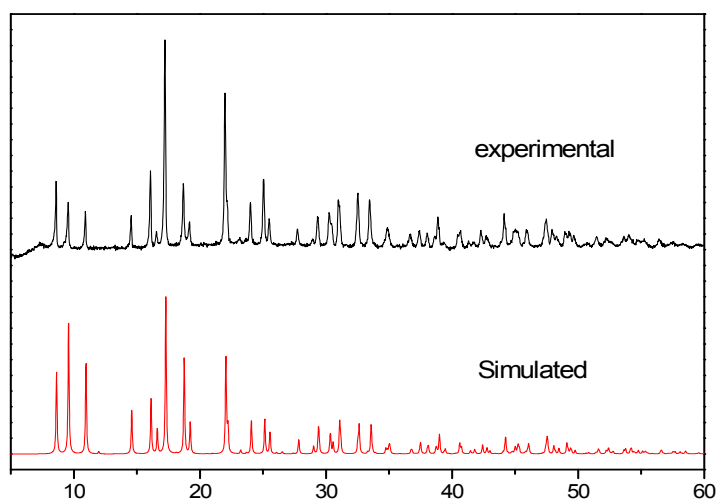

**Fig. S1** The PXRD patterns of Dy-Zn MOFs

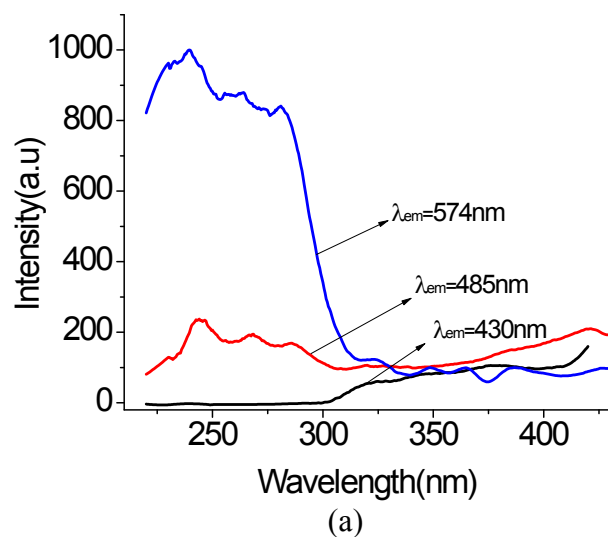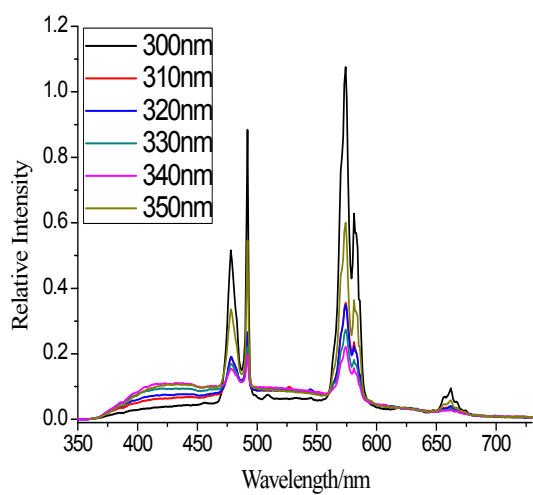

(b)

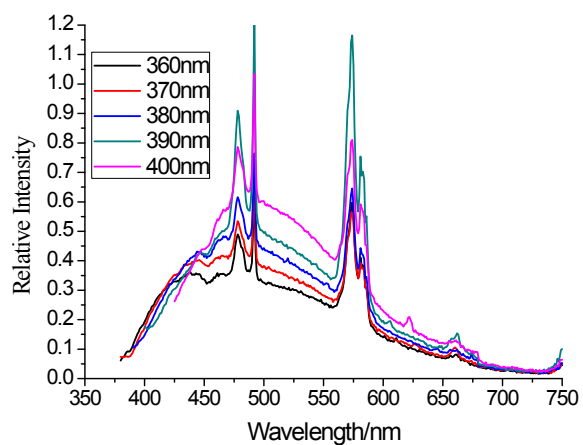

(c)

Fig. S2 a) Excitation spectra of Dy-Zn MOFs with 574, 486 and 431 nm as the analysis wavelength, respectively. b) and c) Emission spectra of Dy-MOFs at different excitation wavelength.

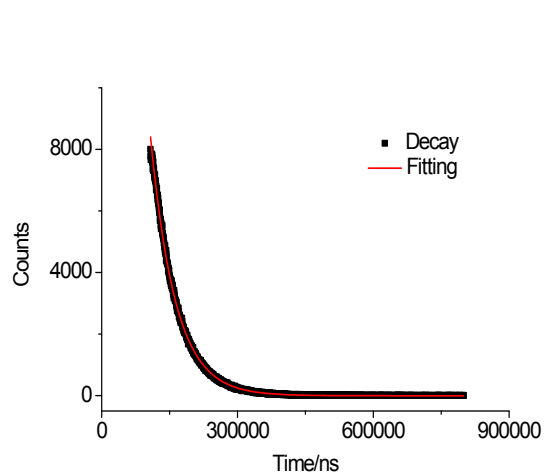

(a)

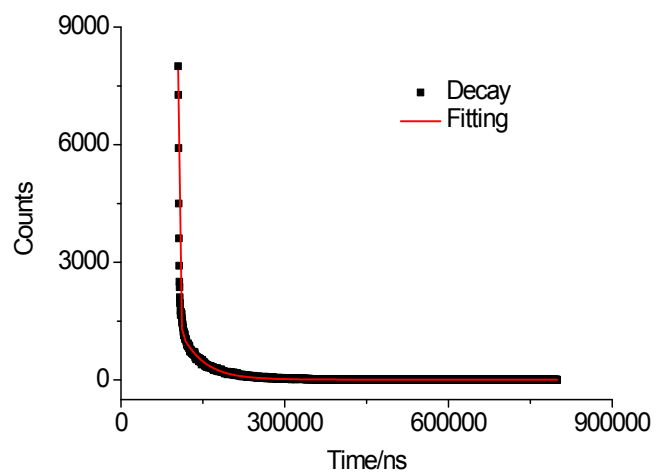

(b)

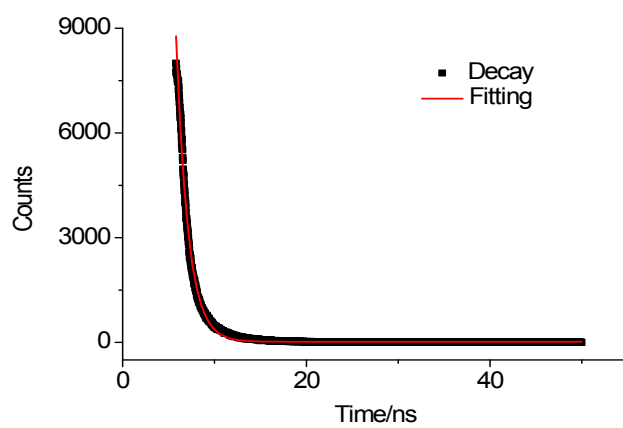

(c)

**Fig. S3** Decay and fitting profiles of the Dy-Zn MOFs when monitored at 574 nm and excited at 290 nm (a) and 340 nm (b), when monitored at 431 nm and excited at 340 nm (c).

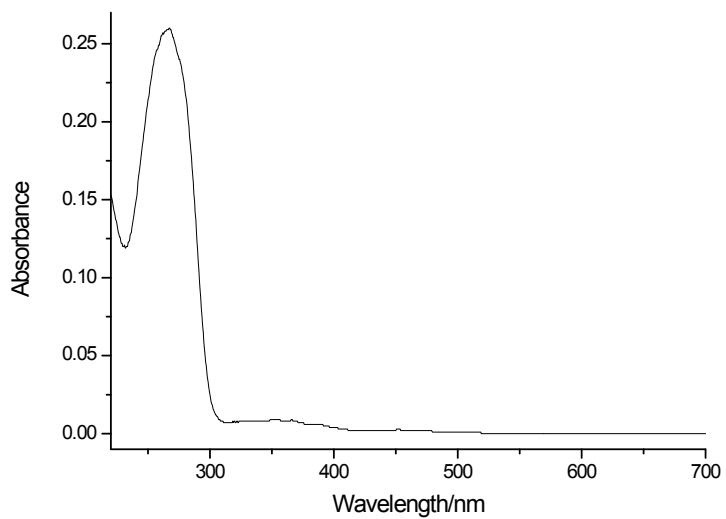

Fig. S4 UV-Vis absorption of Dy-Zn MOF at solid state.

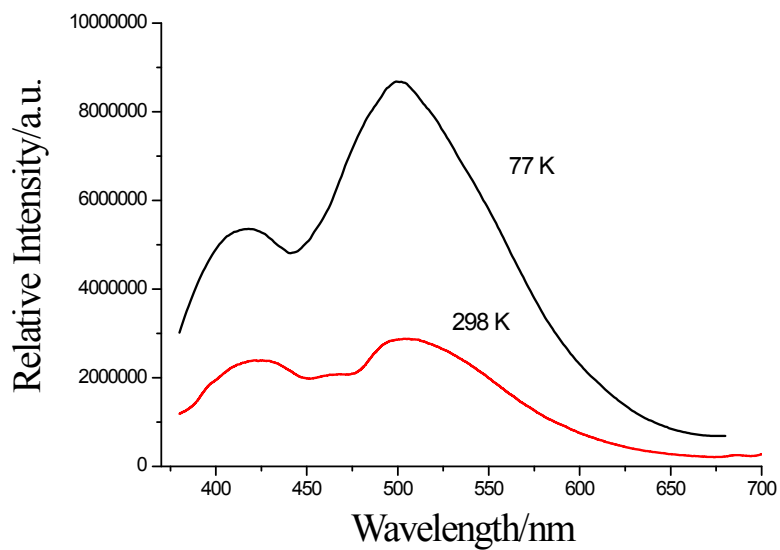

Fig. S5 The phosphorescence spectra of the Gd complex at 77K and 298K.

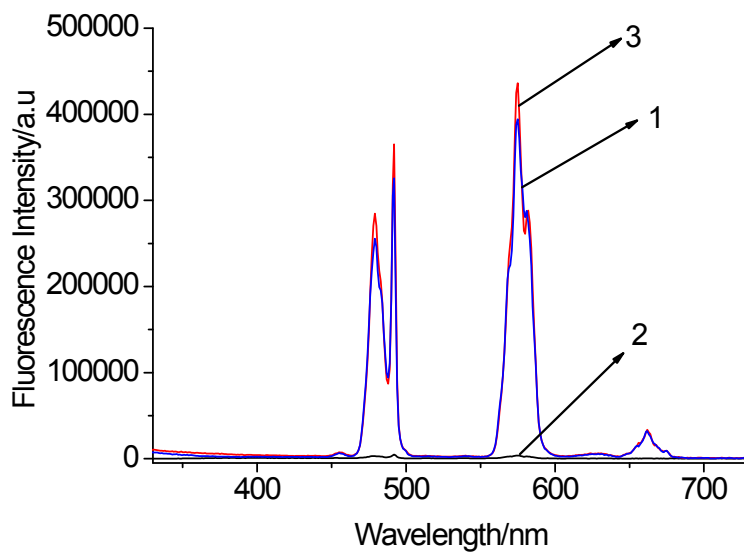

Fig. S6 Fluorescence changes of Dy-Zn MOF. (1) 0.5 mM Dy-Zn MOF in DMSO solution; (2) the addition of 2.5 mM  $\text{Cu}^{2+}$  to 0.5 mM Dy-Zn MOF in DMSO solution; (3) the sample of (2) was washed with  $\text{H}_2\text{O}$  and then dispersed in DMSO solution.

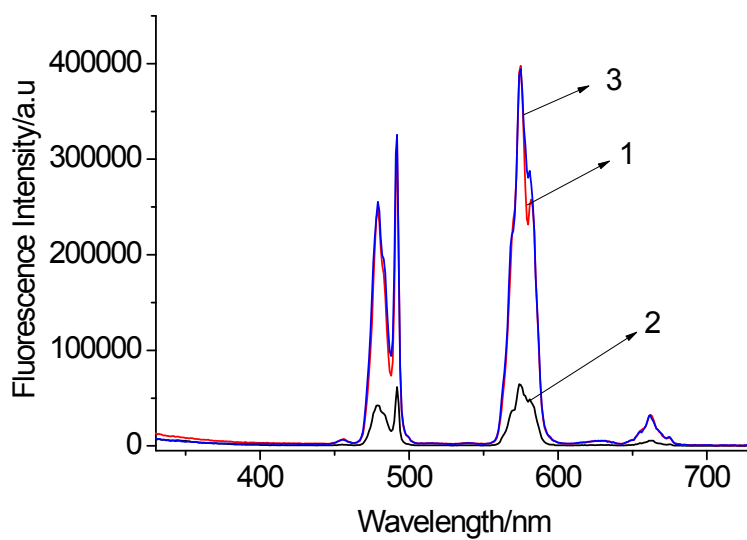

Fig. S7 Fluorescence changes of Dy-Zn MOF. (1) 0.5 mM Dy-Zn MOF in DMSO solution; (2) the addition of 2.5 mM  $\text{Hg}^{2+}$  to 0.5 mM Dy-Zn MOF in DMSO solution; (3) the sample of (2) was washed with  $\text{H}_2\text{O}$  and then dispersed in DMSO solution.

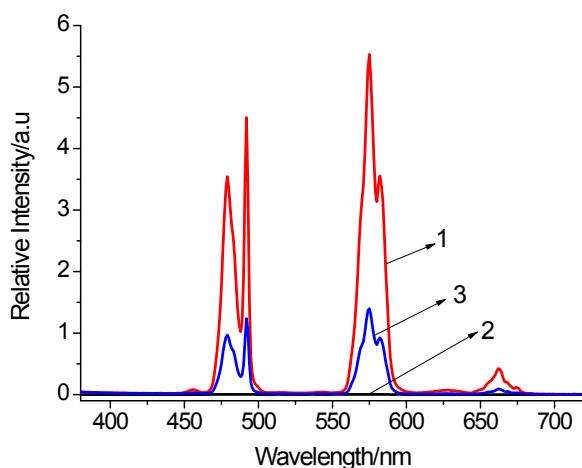

Fig.S8 Emission spectra of Dy-Zn MOF dispersed in DMSO (1), upon addition of  $\text{Fe}^{3+}$ (2), and the sample dispersed in DMSO after centrifugation and washing with water for three times (3).

**Table S1** Crystal data and refinement for Dy-Zn MOF.

|                                                 | Dy-Zn MOF                                                                  |
|-------------------------------------------------|----------------------------------------------------------------------------|
| Empirical formula                               | $\text{C}_{32}\text{H}_{37}\text{Zn}_4\text{N}_{16}\text{O}_{24}\text{Dy}$ |
| $F_w$                                           | 716.29                                                                     |
| $T / \text{K}$                                  | 293(2)                                                                     |
| Wavelength/ $\text{\AA}$                        | 0.71073                                                                    |
| Crystal system                                  | Orthorhombic                                                               |
| Space group                                     | $I222$                                                                     |
| $a / \text{\AA}$                                | 10.659(2)                                                                  |
| $b / \text{\AA}$                                | 12.327(2)                                                                  |
| $c / \text{\AA}$                                | 18.406(4)                                                                  |
| $\alpha / ^\circ$                               | 90                                                                         |
| $\beta / ^\circ$                                | 90                                                                         |
| $\gamma / ^\circ$                               | 90                                                                         |
| $V / \text{\AA}^3$                              | 2418.4(8)                                                                  |
| $Z$                                             | 4                                                                          |
| $D_c / \text{g}\cdot\text{cm}^{-3}$             | 1.967                                                                      |
| $\mu / \text{mm}^{-1}$                          | 3.582                                                                      |
| Reflections collected, unique, $R_{\text{int}}$ | 8319, 2789<br>0.0362                                                       |
| $R$ indices (all data)                          | $R_1 = 0.0478$<br>$wR_2 = 0.1457$                                          |
| CCDC no.                                        | 1444495                                                                    |

**Table S2** Selected bond lengths[Å] and angles[deg]for the Dy-Zn MOF.

|                     |          |                     |          |                     |           |                     |          |
|---------------------|----------|---------------------|----------|---------------------|-----------|---------------------|----------|
| Dy(1)-O(3)#1        | 2.306(5) | Dy(1)-O(3)          | 2.306(5) | Dy(1)-O(3) #2       | 2.306(5)  | Dy(1)-O(3)#3        | 2.306(5) |
| Dy(1)-O(2)#1        | 2.373(6) | Dy(1)-O(2)#2        | 2.373(6) | Dy(1)-O(2)#3        | 2.373(6)  | Dy(1)-O(2)          | 2.373(6) |
| Zn(1)-N(1)          | 2.004(9) | Zn(1)-N(2)#5        | 2.001(9) | Zn(1)-N(3)          | 1.956(15) | Zn(1)-O(1)          | 2.166(7) |
| Zn(1)-O(4)#5        | 2.150(6) |                     |          |                     |           |                     |          |
| O(3) -Dy(1)-O(3)#1  | 86.4(3)  | O(3) -Dy(1)-O(3)#2  | 146.2(3) | O(3)#1-Dy(1)-O(3)#2 | 103.4(3)  | O(3)-Dy(1)-O(3)#3   | 103.4(3) |
| O(3)#1-Dy(1)-O(3)#3 | 146.2(3) | O(3)#2-Dy(1)-O(3)#3 | 86.4(3)  | O(3) -Dy(1)-O(2)#1  | 70.8(2)   | O(3)#1-Dy(1)-O(2)#1 | 78.1(2)  |
| O(3)#2-Dy(1)-O(2)#1 | 142.6(2) | O(3)#3-Dy(1)-O(2)#1 | 75.0(2)  | O(3) -Dy(1)-O(2)#2  | 75.0(2)   | O(3)#1-Dy(1)-O(2)#2 | 142.6(2) |
| O(3)#2-Dy(1)-O(2)#2 | 78.1(2)  | O(3)#3-Dy(1)-O(2)#2 | 70.8(2)  | O(2)#1-Dy(1)-O(2)#2 | 123.4(3)  | O(3) -Dy(1)-O(2) #3 | 142.6(2) |
| O(3)#1-Dy(1)-O(2)#3 | 75.0(2)  | O(3)#2-Dy(1)-O(2)#3 | 70.8(2)  | O(3)#3-Dy(1)-O(2)#3 | 78.1(2)   | O(2)#1-Dy(1)-O(2)#3 | 73.7(3)  |
| O(2)#2-Dy(1)-O(2)#3 | 136.9(3) | O(3) -Dy(1)-O(2)    | 78.1(2)  | O(3)#1-Dy(1)-O(2)   | 70.8 (2)  | O(3)#2-Dy(1)-O(2)   | 75.0(2)  |
| O(3)#3-Dy(1)-O(2)   | 142.6(2) | O(2)#1-Dy(1)-O(2)   | 136.9(3) | O(2)#2-Dy(1)-O(2)   | 73.7(3)   | O(2)#3-Dy(1)-O(2)   | 123.4(3) |
| N(3')-Zn(1)-N(3)    | 11.4(9)  | N(3')-Zn(1)-N(2)#5  | 124.1(8) | N(3)-Zn(1)-N(2)#5   | 114.3(7)  | N(3')-Zn(1)-N(1)    | 114.7(8) |
| N(3)-Zn(1)-N(1)     | 124.4(7) | N(2)#5-Zn(1)-N(1)   | 121.1(4) | N(3')-Zn(1)-O(4)#5  | 94.9(7)   | N(3)-Zn(1)-O(4)#5   | 99.0(6)  |
| N(2)#5-Zn(2)-O(4)#5 | 79.0(3)  | N(1) -Zn(1)-O(4)#5  | 95.3(3)  | N(3') -Zn(1)-O(1)   | 92.5(7)   | N(3)-Zn(1)-O(1)     | 88.9(7)  |
| N(2)#5-Zn(1)-O(1)   | 99.7(3)  | N(1)-Zn(1)-O(1)     | 78.4(3)  | O(4)#5-Zn(1)-O(1)   | 171.9(4)  |                     |          |

#1 -x,-y+1, z    #2 -x,y,-z+1    #3 x,-y+1,-z+1    #4 x-1/2,-y+1/2,-z+1/2    #5 x+1/2,-y+1/2,-z+1/2

**Table S3** The CIE chromaticity coordinates and correlated color temperature for Dy-Zn MOF at different excitation wavelength.

| Excitation wavelength/nm | CIE chromaticity coordinates | CCT   |
|--------------------------|------------------------------|-------|
| 250                      | (0.39, 0.43)                 | 4094  |
| 260                      | (0.39, 0.43)                 | 4094  |
| 270                      | (0.39, 0.44)                 | 4141  |
| 280                      | (0.39, 0.44)                 | 4141  |
| 290                      | (0.39, 0.44)                 | 4141  |
| 300                      | (0.36, 0.42)                 | 4746  |
| 310                      | (0.32, 0.38)                 | 5952  |
| 320                      | (0.31, 0.37)                 | 6384  |
| 330                      | (0.29, 0.35)                 | 7497  |
| 340                      | (0.28, 0.33)                 | 8436  |
| 350                      | (0.31, 0.36)                 | 6437  |
| 360                      | (0.27, 0.31)                 | 9782  |
| 370                      | (0.26, 0.31)                 | 10616 |
| 380                      | (0.26, 0.31)                 | 10616 |
| 390                      | (0.24, 0.31)                 | 12395 |
| 400                      | (0.22, 0.29)                 | 16506 |
